# Supplementary material for: Theoretical evidence of charge transfer interaction between SO2and deep eutectic solvents formed by choline chloride and glycerol
Source: Royal Society of Chemistry journal article supplement (doi:10.1039/c5cp04172d), 2015-01-01
Supplement: c5cp04172d1.pdf [file c5cp04172d1.pdf]

Supporting Information

Theoretical Evidence of Charge Transfer Interaction between SO<sub>2</sub> and  
Deep Eutectic Solvents formed by ChCl and Glycerol

Hongping Li,<sup>a</sup> Yonghui Chang,\*<sup>b</sup> Wenshuai Zhu,<sup>a</sup> Changwei Wang,<sup>c</sup> Chao Wang,<sup>a</sup>

Siwen Zhu,<sup>a</sup> Ming Zhang,<sup>d</sup> and Huaming Li\*<sup>a,d</sup>

<sup>a</sup> *School of Chemistry and Chemical Engineering, Jiangsu University, Zhenjiang  
212013, P. R. China*

<sup>b</sup> *College of Chemistry and Chemical Engineering, Hainan Normal University,  
Haikou, Hainan 571158, P. R. China*

<sup>c</sup> *Department of Chemistry, School of Science, China University of Petroleum (East  
China), Tsingtao 266580, P. R. China.*

<sup>d</sup> *Institute for Energy Research, Jiangsu University, Zhenjiang 212013, P. R. China*

**\*Corresponding author:** Tel.:+86-511-88791800; Fax: +86-511-88791708;

E-mail address: lihm@ujs.edu.cn (H. M. Li), qqchang@sohu.com (Y. H. Chang)

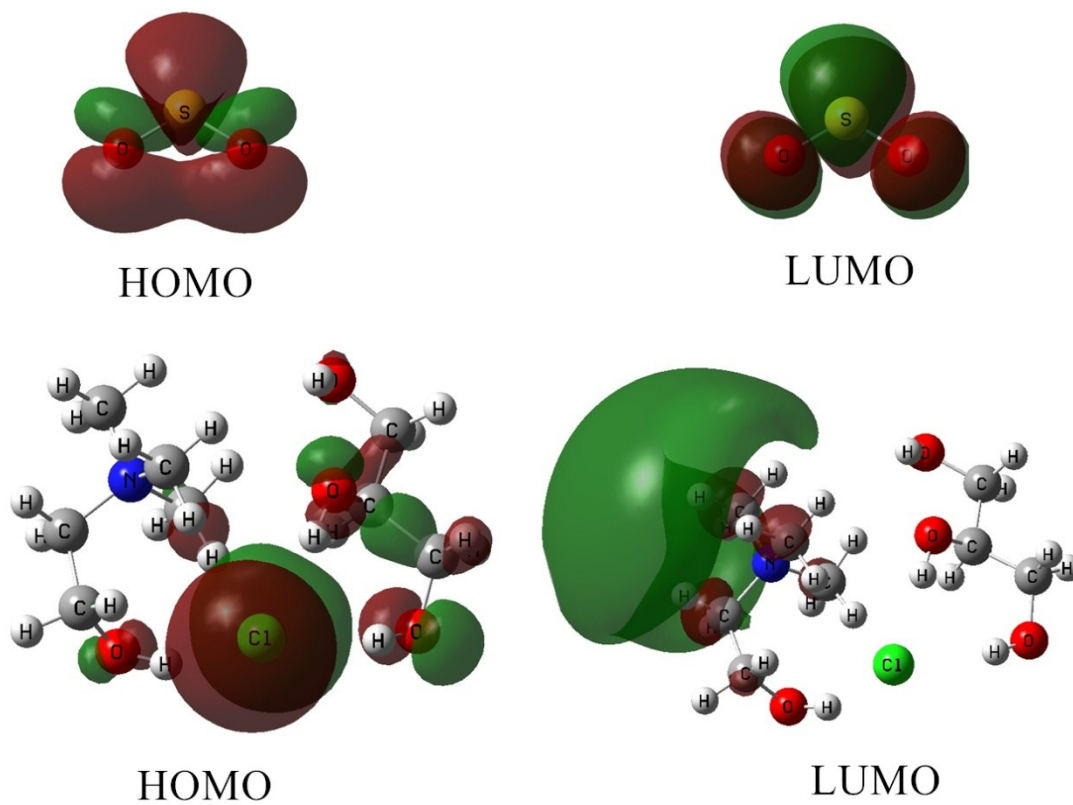

**Figure S1.** Frontier orbitals for SO<sub>2</sub> and DES.

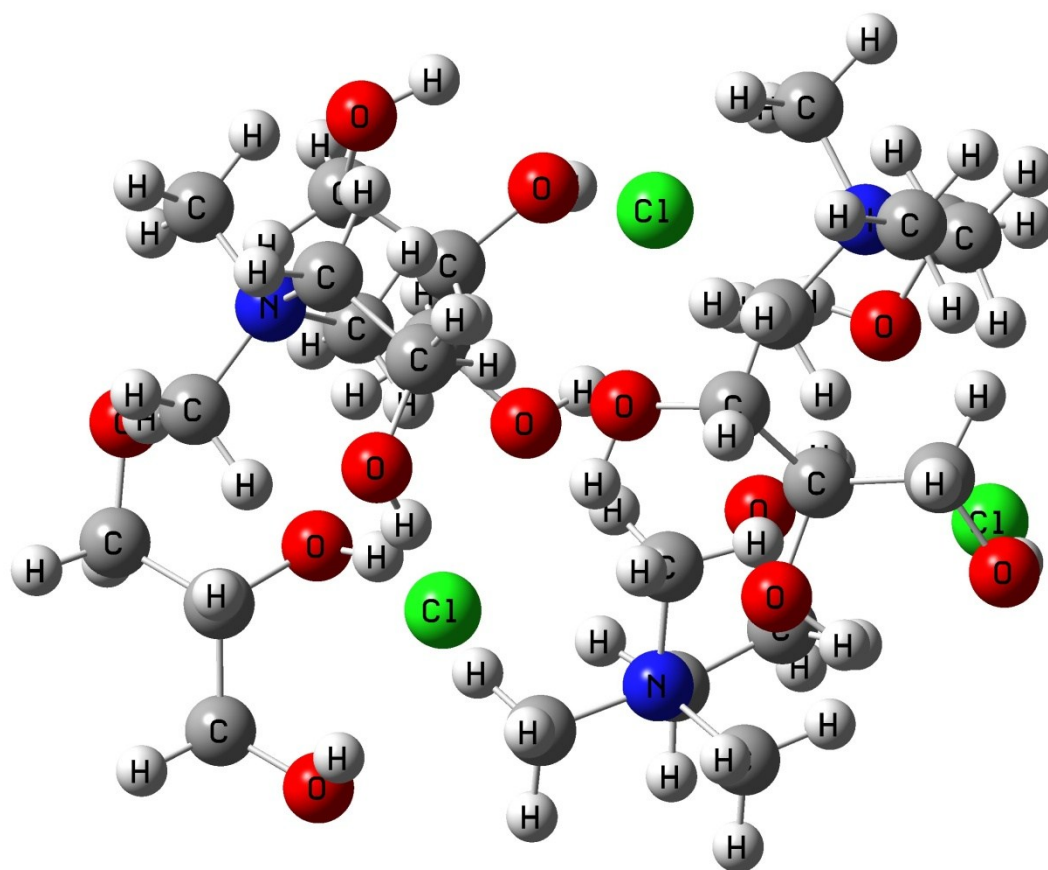

**Figure S2.** Optimized configuration of pure solvents (cluster-3)

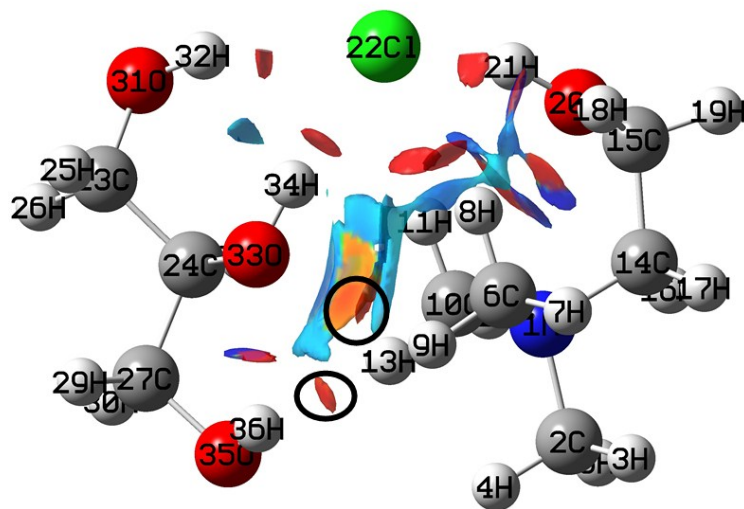

**Figure S3.** Gradient isosurfaces ( $s = 0.35$  au) for complex-c. The surface is colored on a red-green-blue scale according to values of  $\sin(\lambda_2)\rho$ , ranging from -0.02 to 0.02 au. Red indicates strong attractive interactions, and blue indicates strong nonbonded overlap.

\* The colors in the black cycles are red, which means a strong attractive interaction between O33...H9 and O35...H13. These results should be a direct evidence for the hydrogen bonding between C-H groups and O atoms.

**Table S1.** Charge analysis on interaction of SO<sub>2</sub> for different Ch-cation-based species  
(MK charge was used)

|                                   | before | after  | $\Delta_Q$ | SO <sub>2</sub> ( $\Delta_Q$ ) |
|-----------------------------------|--------|--------|------------|--------------------------------|
| Ch <sup>+</sup>                   | 1.000  | 0.975  | -0.025     | 0.025                          |
| [Ch <sub>2</sub> Cl] <sup>+</sup> | 1.000  | 1.104  | 0.104      | -0.104                         |
| [ChCl <sub>2</sub> ] <sup>-</sup> | -1.000 | -0.731 | 0.269      | -0.269                         |

**Table S2.** Calculated entropies for different clusters.

|             | entropy (unit: cal/mol*K) |
|-------------|---------------------------|
| cluster-2-a | 261.61                    |
| cluster-2-b | 250.63                    |
| cluster-2-c | 248.87                    |

\* Strictly speaking, the definition of the compactness in the current manuscript is difficult. Generally, the compactness can be estimated by the volumes of the clusters. Lower volume value means higher compactness of the cluster. According to the Glasser's theory, the values of the volumes for ionic liquids are linearly correlated to the entropies.[1-3] Because of the similarity with ionic liquids, the DESs may possess the same relationship between entropies and volumes. Hence, the entropies of three clusters have been calculated (**Table S2**). These results show the order of the entropy follows: cluster-2-a < cluster-2-b < cluster-2-c. According to the Glasser's theory, it can be roughly known that the volume of the clusters also follow the same order.

[1] L. Glasser, *Thermochim Acta*, 2004, 421, 87-93.

[2] J. Wei, C. Chang, Y. Y. Zhang, S. Y. Hou, D. W. Fang and W. Guan, *J Chem Thermodyn*, 2015, 90, 310-316.

[3] Q. S. Liu, J. Liu, X. X. Liu and S. T. Zhang, *J Chem Thermodyn*, 2015, 90, 39-45.

## The optimized geometries of the crucial structure reported in the paper

|    | <b>abs-com-a</b> |             |             |
|----|------------------|-------------|-------------|
| N  | -2.16658900      | -1.12067700 | 0.55704100  |
| C  | -2.29277800      | -2.38501700 | 1.33975300  |
| H  | -2.73318800      | -3.15559500 | 0.70487500  |
| H  | -1.29729400      | -2.68740800 | 1.66828100  |
| H  | -2.93010000      | -2.19963000 | 2.20580300  |
| C  | -1.27155300      | -1.37306000 | -0.61949000 |
| H  | -1.73127100      | -2.13438900 | -1.25274600 |
| H  | -1.12427000      | -0.44199500 | -1.16785400 |
| H  | -0.30996000      | -1.71596200 | -0.23895000 |
| C  | -1.53450700      | -0.08450100 | 1.44509300  |
| H  | -1.32215700      | 0.80273700  | 0.85035000  |
| H  | -2.24017800      | 0.15627300  | 2.24154000  |
| H  | -0.60861100      | -0.51339000 | 1.83668100  |
| C  | -3.54885200      | -0.70851600 | 0.10322600  |
| C  | -3.64585900      | 0.58446200  | -0.69857300 |
| H  | -4.15135900      | -0.60963800 | 1.01142200  |
| H  | -3.92877600      | -1.54741500 | -0.48904900 |
| H  | -2.94187700      | 0.59241700  | -1.53866600 |
| H  | -4.66010500      | 0.58597200  | -1.12068100 |
| O  | -3.47759300      | 1.70974200  | 0.11893800  |
| H  | -2.69449100      | 2.19716000  | -0.20231800 |
| Cl | -0.69279300      | 2.23443200  | -1.21347400 |
| C  | 2.69177400       | 2.06703000  | 0.79273800  |
| C  | 1.74596300       | 0.90808400  | 1.08996300  |
| H  | 3.38039800       | 1.74636200  | -0.00627800 |
| H  | 3.29023700       | 2.28910100  | 1.68415600  |
| C  | 2.41911200       | -0.19159500 | 1.90107200  |
| H  | 0.88998700       | 1.30639300  | 1.65633600  |
| H  | 3.35585400       | -0.49473700 | 1.41101200  |
| H  | 2.66903900       | 0.19683600  | 2.89295900  |
| O  | 2.02790200       | 3.26082400  | 0.46167800  |
| H  | 1.33321000       | 3.09863600  | -0.19919400 |
| O  | 1.25974200       | 0.31293300  | -0.10899400 |
| H  | 0.64597500       | 0.94788200  | -0.57569200 |
| O  | 1.57108500       | -1.31229400 | 2.08357100  |
| H  | 1.70731200       | -1.89490800 | 1.32302900  |
| S  | 2.27213700       | -1.33477600 | -1.57551900 |
| O  | 1.10054300       | -1.43615000 | -2.42413400 |
| O  | 2.34472500       | -2.31133200 | -0.49101300 |

**abs-com-b**

|    |             |             |             |
|----|-------------|-------------|-------------|
| N  | -1.98738300 | -1.78918200 | -0.27062900 |
| C  | -3.44381300 | -1.74618700 | -0.59070100 |
| H  | -3.72518700 | -0.70809800 | -0.77725400 |
| H  | -3.62770200 | -2.35218900 | -1.47903200 |
| H  | -4.00353300 | -2.14616900 | 0.25649200  |
| C  | -1.22519100 | -1.20269400 | -1.42336200 |
| H  | -1.45989500 | -0.13907600 | -1.48277600 |
| H  | -0.16029500 | -1.37212100 | -1.26335600 |
| H  | -1.54564200 | -1.72110300 | -2.32913400 |
| C  | -1.55883700 | -3.21368400 | -0.07908700 |
| H  | -0.47469400 | -3.24708900 | 0.02591300  |
| H  | -2.04239100 | -3.60653700 | 0.81616400  |
| H  | -1.86746100 | -3.77448700 | -0.96346800 |
| C  | -1.78687200 | -0.96851300 | 0.99233500  |
| C  | -0.34990500 | -0.76384900 | 1.43875100  |
| H  | -2.34584000 | -1.48665000 | 1.77748500  |
| H  | -2.24597000 | 0.00143800  | 0.78851100  |
| H  | 0.25235200  | -0.36980200 | 0.60993100  |
| H  | -0.40145100 | 0.02153700  | 2.20482900  |
| O  | 0.20638900  | -1.92926500 | 1.98727800  |
| H  | 0.94048000  | -2.21793800 | 1.40726800  |
| Cl | 1.99425000  | -2.46372800 | -0.47976100 |
| C  | 3.18250700  | 0.65381500  | 0.62098600  |
| C  | 2.38145800  | 1.37445200  | -0.45838100 |
| H  | 2.49351400  | 0.09429800  | 1.27251500  |
| H  | 3.69025300  | 1.40791500  | 1.23585800  |
| C  | 1.42245200  | 2.39020900  | 0.16173100  |
| H  | 3.08364900  | 1.88077100  | -1.13566800 |
| H  | 0.92094000  | 1.95143400  | 1.03740900  |
| H  | 1.94324800  | 3.30062400  | 0.46799800  |
| O  | 4.16669000  | -0.18457300 | 0.07544100  |
| H  | 3.77039400  | -1.05706400 | -0.09557200 |
| O  | 1.56065500  | 0.50064800  | -1.21999100 |
| H  | 1.88563000  | -0.42466900 | -1.17536200 |
| O  | 0.43027300  | 2.75972800  | -0.79989500 |
| H  | 0.37882800  | 2.00764200  | -1.42043900 |
| S  | -1.76088700 | 2.87601200  | 0.08010300  |
| O  | -1.40230900 | 2.37977600  | 1.40077600  |
| O  | -2.33749900 | 1.87462100  | -0.81651500 |



**abs-com-e**

|    |             |             |             |
|----|-------------|-------------|-------------|
| N  | 2.64010300  | 0.16562700  | 1.17227900  |
| C  | 3.55771800  | 1.04560500  | 1.95134100  |
| H  | 3.49144400  | 2.05729100  | 1.54929200  |
| H  | 3.24784500  | 1.03842700  | 2.99737200  |
| H  | 4.57706900  | 0.66836400  | 1.85704800  |
| C  | 1.22964100  | 0.65261800  | 1.37472900  |
| H  | 1.17143600  | 1.68431400  | 1.03375600  |
| H  | 0.53785000  | 0.03755000  | 0.79978500  |
| H  | 0.99371300  | 0.58499100  | 2.43810200  |
| C  | 2.76676300  | -1.24026800 | 1.65913700  |
| H  | 2.00906500  | -1.85312200 | 1.17140200  |
| H  | 3.77196800  | -1.59995200 | 1.42952900  |
| H  | 2.60112400  | -1.24604000 | 2.73787800  |
| C  | 3.02359200  | 0.26360900  | -0.28808100 |
| C  | 2.32808000  | -0.74102900 | -1.21220300 |
| H  | 4.10856200  | 0.13215000  | -0.34268900 |
| H  | 2.75431900  | 1.27322300  | -0.61068500 |
| H  | 2.73878000  | -1.74683300 | -1.07934400 |
| H  | 1.25462200  | -0.78100800 | -0.99741600 |
| O  | 2.58359100  | -0.35745600 | -2.53504800 |
| H  | 2.00103000  | 0.40130000  | -2.72546800 |
| Cl | 0.46226200  | 1.93772900  | -1.85318900 |
| C  | -2.50537100 | 2.14370100  | 0.93773100  |
| C  | -2.95530100 | 0.72393200  | 0.60826000  |
| H  | -2.86242400 | 2.39875400  | 1.93945300  |
| H  | -2.97503100 | 2.83725600  | 0.22592500  |
| C  | -2.55991800 | 0.27154400  | -0.80062200 |
| H  | -2.49646200 | 0.02585700  | 1.32490000  |
| H  | -3.24724300 | -0.52404400 | -1.11528700 |
| H  | -2.64425800 | 1.09613700  | -1.52050000 |
| O  | -1.09969800 | 2.27791800  | 0.94239400  |
| H  | -0.76553300 | 2.35958100  | 0.03068000  |
| O  | -4.36764300 | 0.73693100  | 0.73391000  |
| H  | -4.69020100 | -0.17131000 | 0.70693300  |
| O  | -1.23960800 | -0.25265100 | -0.82766100 |
| H  | -0.62806500 | 0.39417300  | -1.28011100 |
| S  | -1.13719200 | -2.56599100 | -0.35686200 |
| O  | -2.44105600 | -2.54818200 | 0.28297900  |
| O  | 0.01380000  | -2.46034100 | 0.53539400  |

**abs-com-d**

|    |             |             |             |
|----|-------------|-------------|-------------|
| N  | -1.03583100 | -2.14251600 | -0.18200500 |
| C  | -0.91849700 | -3.43090800 | -0.92465300 |
| H  | -1.75672800 | -3.51954100 | -1.61750200 |
| H  | 0.02626300  | -3.43157700 | -1.47034800 |
| H  | -0.93315900 | -4.25348100 | -0.20774600 |
| C  | -1.04208600 | -1.00795700 | -1.16104900 |
| H  | -1.94958200 | -1.06165000 | -1.76478300 |
| H  | -1.01081900 | -0.07772200 | -0.60065400 |
| H  | -0.14474400 | -1.07162200 | -1.77627800 |
| C  | 0.16070200  | -2.00613600 | 0.71756100  |
| H  | 0.14954300  | -1.01360500 | 1.16460900  |
| H  | 0.09238600  | -2.76891500 | 1.49457200  |
| H  | 1.05437900  | -2.13850100 | 0.10312900  |
| C  | -2.32981500 | -2.16982800 | 0.60459400  |
| C  | -2.68093200 | -0.90863500 | 1.38418200  |
| H  | -2.24608800 | -3.01417100 | 1.29570500  |
| H  | -3.11741100 | -2.37914000 | -0.12622700 |
| H  | -2.68816600 | -0.02554100 | 0.73613200  |
| H  | -3.71470800 | -1.06297900 | 1.72263700  |
| O  | -1.84347400 | -0.74429700 | 2.49856800  |
| H  | -1.38623900 | 0.11172800  | 2.41441200  |
| Cl | -0.33695700 | 1.70751200  | 1.16260500  |
| C  | 3.58237100  | 1.22249100  | 0.65973200  |
| C  | 2.82573700  | 0.01090000  | 0.12666300  |
| H  | 3.72462000  | 1.93132000  | -0.17010600 |
| H  | 4.57201900  | 0.90466800  | 1.00922000  |
| C  | 3.72805300  | -0.91353900 | -0.68314600 |
| H  | 2.42325400  | -0.53610700 | 0.99441000  |
| H  | 4.31901800  | -0.31943300 | -1.39595800 |
| H  | 4.41512800  | -1.45082400 | -0.02506000 |
| O  | 2.96023300  | 1.82814400  | 1.76874400  |
| H  | 2.03951900  | 2.05429700  | 1.56210400  |
| O  | 1.77698800  | 0.36587000  | -0.76161900 |
| H  | 1.12376300  | 0.92518100  | -0.30187900 |
| O  | 2.96029700  | -1.88816500 | -1.37365700 |
| H  | 2.34808700  | -1.37811200 | -1.92180900 |
| S  | -1.86282100 | 2.47770400  | -1.09950300 |
| O  | -2.99691300 | 1.59786600  | -0.83596700 |
| O  | -0.92079400 | 1.98108500  | -2.09107800 |

**abs-com-e**

|    |             |             |             |
|----|-------------|-------------|-------------|
| N  | 2.53840300  | 0.92476900  | -0.35271900 |
| C  | 3.41289900  | -0.14822500 | 0.22088400  |
| H  | 2.77524900  | -0.85909300 | 0.74955600  |
| H  | 3.93429800  | -0.64064300 | -0.60132000 |
| H  | 4.12909300  | 0.31510200  | 0.90166900  |
| C  | 1.54712600  | 0.27317200  | -1.27376500 |
| H  | 0.88368800  | -0.33921900 | -0.66824100 |
| H  | 0.96587200  | 1.02677700  | -1.79987500 |
| H  | 2.09053700  | -0.35389300 | -1.98290800 |
| C  | 3.37328200  | 1.90387500  | -1.10011300 |
| H  | 2.72609200  | 2.65809100  | -1.54809200 |
| H  | 4.07531200  | 2.37207000  | -0.40731800 |
| H  | 3.91582000  | 1.37324100  | -1.88413600 |
| C  | 1.80379700  | 1.60264000  | 0.78270500  |
| C  | 0.94346100  | 2.80054000  | 0.35965800  |
| H  | 2.56041300  | 1.90755700  | 1.51202400  |
| H  | 1.17335400  | 0.82938500  | 1.22878400  |
| H  | 1.54741300  | 3.71052800  | 0.28581800  |
| H  | 0.47610300  | 2.61785200  | -0.61670100 |
| O  | -0.02968000 | 3.02680900  | 1.34180900  |
| H  | -0.69405200 | 2.32690500  | 1.20987400  |
| C  | -3.66952100 | 0.98306500  | -0.21154000 |
| C  | -2.27270200 | 0.77859900  | -0.78861800 |
| H  | -3.93768400 | 0.10788300  | 0.40169100  |
| H  | -4.40015500 | 1.06905900  | -1.02090700 |
| C  | -2.20386800 | -0.50652400 | -1.60248900 |
| H  | -2.01999300 | 1.63345900  | -1.42888100 |
| H  | -2.31471200 | -1.36425000 | -0.92517400 |
| H  | -3.04536100 | -0.51544200 | -2.30948200 |
| O  | -3.76051000 | 2.17493500  | 0.53781100  |
| H  | -3.11049100 | 2.12438700  | 1.24881600  |
| O  | -1.31197300 | 0.79545000  | 0.27053500  |
| H  | -1.35235000 | -0.06546900 | 0.73874800  |
| O  | -0.98635900 | -0.58992500 | -2.31768300 |
| H  | -0.57862900 | -1.44784800 | -2.11821900 |
| Cl | 0.49441400  | -3.01294800 | -0.79275300 |
| S  | -0.07819100 | -2.38189300 | 1.49058000  |
| O  | 0.95633300  | -1.35500100 | 1.72758100  |
| O  | -1.40899500 | -1.77130100 | 1.29126000  |

**cluster-2-c**

|    |             |             |             |
|----|-------------|-------------|-------------|
| N  | -0.96491400 | 0.42731800  | 2.94942000  |
| C  | -0.88487000 | -0.90123100 | 3.62651800  |
| H  | -1.00539200 | -0.75872200 | 4.70250600  |
| H  | -1.67473400 | -1.54145700 | 3.23004600  |
| H  | 0.09622200  | -1.32485500 | 3.40246100  |
| C  | -2.31218700 | 1.02853900  | 3.16738600  |
| H  | -2.47956000 | 1.14731500  | 4.23957200  |
| H  | -2.35062300 | 1.99500500  | 2.66026300  |
| H  | -3.05316000 | 0.35840900  | 2.72871500  |
| C  | -0.77081800 | 0.21448500  | 1.47772800  |
| H  | -0.95906700 | 1.16094200  | 0.96542500  |
| H  | 0.26101900  | -0.10641100 | 1.34080300  |
| H  | -1.48032300 | -0.55185100 | 1.15764000  |
| C  | 0.11986900  | 1.31526300  | 3.53061200  |
| C  | 0.45570200  | 2.54507500  | 2.70144900  |
| H  | 1.01871800  | 0.69467700  | 3.59289900  |
| H  | -0.22399700 | 1.58410800  | 4.53355100  |
| H  | -0.43268000 | 3.00518500  | 2.24582000  |
| H  | 0.90111900  | 3.27927100  | 3.38765400  |
| O  | 1.37822000  | 2.13968800  | 1.72307500  |
| H  | 1.45748000  | 2.79544100  | 1.00918600  |
| Cl | -1.11542900 | 3.30998900  | -0.38540800 |
| C  | -3.98967300 | 1.61762100  | -1.35781700 |
| C  | -3.46518800 | 0.25945400  | -0.87007600 |
| H  | -5.01445700 | 1.49910900  | -1.73053300 |
| H  | -3.35805500 | 1.99953700  | -2.16960600 |
| C  | -3.89678100 | -0.88583100 | -1.77762100 |
| H  | -2.36580200 | 0.28875600  | -0.79438300 |
| H  | -4.94559600 | -0.74904800 | -2.07567800 |
| H  | -3.27436000 | -0.92228700 | -2.67744900 |
| O  | -4.04581400 | 2.52357000  | -0.27952400 |
| H  | -3.15708500 | 2.94256900  | -0.20443700 |
| O  | -4.01153700 | -0.00241000 | 0.41968700  |
| H  | -4.27732000 | 0.87278400  | 0.75376200  |
| O  | -3.75794300 | -2.13913900 | -1.12471900 |
| H  | -4.10902100 | -2.02348000 | -0.22791600 |
| S  | -1.39546700 | -3.09040800 | -0.95326300 |
| O  | -1.40910500 | -2.91427500 | 0.49272600  |
| O  | -0.87828600 | -1.95992600 | -1.71818100 |
| N  | 1.29959600  | 1.05864200  | -2.41262500 |
| C  | -0.00548400 | 1.01042400  | -3.14264400 |
| H  | 0.16190700  | 1.29945100  | -4.18253700 |
| H  | -0.39301200 | -0.00858600 | -3.08216700 |

|    |             |             |             |
|----|-------------|-------------|-------------|
| H  | -0.68562500 | 1.71090000  | -2.64872800 |
| C  | 2.26269100  | 0.10072500  | -3.02947900 |
| H  | 2.46859100  | 0.41630000  | -4.05482400 |
| H  | 3.17466000  | 0.07949200  | -2.42964700 |
| H  | 1.80534800  | -0.89008700 | -3.00966800 |
| C  | 1.03976800  | 0.64011900  | -0.99671300 |
| H  | 1.98724900  | 0.56015600  | -0.46602900 |
| H  | 0.40757800  | 1.40644600  | -0.55317600 |
| H  | 0.53793000  | -0.32861600 | -1.03945600 |
| C  | 1.80007800  | 2.48680300  | -2.48070800 |
| C  | 3.10842600  | 2.78538100  | -1.76143400 |
| H  | 0.99944600  | 3.10154900  | -2.05350500 |
| H  | 1.90580000  | 2.70922700  | -3.54808800 |
| H  | 3.88846700  | 2.05393300  | -2.00433300 |
| H  | 3.43905600  | 3.75779800  | -2.14849100 |
| O  | 2.94081700  | 2.88344800  | -0.36972000 |
| H  | 3.45946500  | 2.16543100  | 0.04842700  |
| Cl | 4.40161500  | 0.18746600  | 0.13697500  |
| C  | 2.52114700  | -2.14923200 | 1.83452300  |
| C  | 1.84273500  | -2.49635700 | 0.50950400  |
| H  | 3.60226300  | -2.32139300 | 1.75372500  |
| H  | 2.12852100  | -2.81110200 | 2.61803400  |
| C  | 1.48562800  | -3.97248200 | 0.42597400  |
| H  | 0.90661500  | -1.92088200 | 0.46038400  |
| H  | 2.37839300  | -4.59043600 | 0.59763500  |
| H  | 0.72241900  | -4.22498400 | 1.16819700  |
| O  | 2.24511800  | -0.82428400 | 2.25545300  |
| H  | 2.85628400  | -0.21923400 | 1.78923700  |
| O  | 2.62458800  | -2.22544300 | -0.64209900 |
| H  | 3.26059500  | -1.49860200 | -0.46048800 |
| O  | 0.93225200  | -4.26331100 | -0.85102000 |
| H  | 1.52150000  | -3.83956700 | -1.49543900 |

**cluster-2-e**

|    |             |             |             |
|----|-------------|-------------|-------------|
| N  | -0.54809800 | -2.30038800 | 1.85426900  |
| C  | 0.45491000  | -2.41725900 | 2.95880700  |
| H  | 1.44339100  | -2.51236400 | 2.51072600  |
| H  | 0.42163400  | -1.50739000 | 3.55951600  |
| H  | 0.20402100  | -3.29352000 | 3.56028700  |
| C  | -0.15174800 | -1.15018700 | 0.98267700  |
| H  | 0.80165500  | -1.38843600 | 0.51055400  |
| H  | -0.92811700 | -0.98726400 | 0.23555700  |
| H  | -0.03755800 | -0.27966200 | 1.62685400  |
| C  | -1.89546000 | -2.02295100 | 2.44442800  |
| H  | -2.62621000 | -1.96688400 | 1.63942600  |
| H  | -2.14390900 | -2.83425700 | 3.13148100  |
| H  | -1.83357400 | -1.07479700 | 2.97974800  |
| C  | -0.55282000 | -3.60340500 | 1.07677100  |
| C  | -1.10478500 | -3.49995300 | -0.33132100 |
| H  | -1.13894300 | -4.30790300 | 1.67471600  |
| H  | 0.48826500  | -3.93016100 | 1.02253700  |
| H  | -0.47825200 | -2.83467300 | -0.94178000 |
| H  | -1.02848800 | -4.51058400 | -0.75914100 |
| O  | -2.43981200 | -3.05121900 | -0.30256700 |
| H  | -2.64592500 | -2.69036500 | -1.19033700 |
| Cl | 0.19320400  | -0.54299100 | -2.44108600 |
| C  | -3.63677700 | -0.71797100 | -2.58569200 |
| C  | -3.23587800 | 0.32712900  | -1.55152400 |
| H  | -3.78186000 | -0.21847600 | -3.55302900 |
| H  | -4.58414600 | -1.18325600 | -2.28930500 |
| C  | -4.41980700 | 1.20320600  | -1.16702800 |
| H  | -2.86047200 | -0.18901000 | -0.65113200 |
| H  | -4.91193100 | 1.59380900  | -2.06796400 |
| H  | -5.14531100 | 0.64202100  | -0.57203000 |
| O  | -2.70193400 | -1.77635700 | -2.70250200 |
| H  | -1.80424700 | -1.42372100 | -2.87411300 |
| O  | -2.25531000 | 1.22681600  | -2.04357900 |
| H  | -1.42273100 | 0.72842900  | -2.21459200 |
| O  | -3.96662200 | 2.29290500  | -0.36980500 |
| H  | -3.13117500 | 2.57541500  | -0.78049300 |
| N  | 1.35145400  | 2.82218000  | -0.69950900 |
| C  | 0.63286000  | 3.28372800  | -1.92451500 |
| H  | 1.32337900  | 3.86209900  | -2.54102900 |
| H  | 0.28793200  | 2.40171400  | -2.46818600 |
| H  | -0.21694400 | 3.89931300  | -1.62396800 |
| C  | 2.48296200  | 1.92977600  | -1.12421600 |
| H  | 3.21093800  | 2.52008500  | -1.68243800 |

|    |             |             |             |
|----|-------------|-------------|-------------|
| H  | 2.93457400  | 1.48929000  | -0.23526600 |
| H  | 2.06405500  | 1.14457800  | -1.75599400 |
| C  | 0.38840400  | 2.04087200  | 0.14614600  |
| H  | 0.94020100  | 1.58724100  | 0.96716900  |
| H  | -0.37139300 | 2.72185600  | 0.53069500  |
| H  | -0.05414100 | 1.27076400  | -0.48788300 |
| C  | 1.87294700  | 4.02851700  | 0.04086500  |
| C  | 2.68653000  | 3.75147400  | 1.30279000  |
| H  | 0.99932800  | 4.63340900  | 0.30303800  |
| H  | 2.48628500  | 4.58017600  | -0.67904500 |
| H  | 3.49338500  | 3.03562200  | 1.10620700  |
| H  | 3.15762400  | 4.71023000  | 1.55765700  |
| O  | 1.88378900  | 3.33579500  | 2.37383400  |
| H  | 2.12637700  | 2.41487700  | 2.59549600  |
| Cl | 2.76935600  | 0.32330800  | 2.22102000  |
| C  | 2.81441800  | -2.83926900 | -0.82167600 |
| C  | 3.37088700  | -1.42170500 | -0.78910800 |
| H  | 3.54015500  | -3.52077600 | -1.28804900 |
| H  | 1.88225000  | -2.86394400 | -1.39603500 |
| C  | 3.94050700  | -0.99084300 | -2.13377000 |
| H  | 2.56858800  | -0.73430400 | -0.49307700 |
| H  | 4.63272000  | -1.76190300 | -2.50435200 |
| H  | 3.13205200  | -0.86306100 | -2.86029100 |
| O  | 2.52693700  | -3.27333700 | 0.50170500  |
| H  | 3.31419100  | -3.03817100 | 1.01765600  |
| O  | 4.41411800  | -1.36441700 | 0.17625900  |
| H  | 4.10226600  | -0.80730700 | 0.91963300  |
| O  | 4.61207700  | 0.25086000  | -2.00941300 |
| H  | 5.21383800  | 0.14308200  | -1.25857000 |
| S  | -3.52167200 | 1.48364400  | 1.93378100  |
| O  | -2.09388800 | 1.25562600  | 1.76031800  |
| O  | -4.37272100 | 0.31645000  | 1.77757800  |

**cluster-3-a**

|    |             |             |             |
|----|-------------|-------------|-------------|
| N  | -0.86484100 | 1.08040400  | -3.13686900 |
| C  | 0.40290900  | 1.15389600  | -3.92590200 |
| H  | 0.15442200  | 1.29597300  | -4.97945800 |
| H  | 0.99774300  | 1.98915600  | -3.55396000 |
| H  | 0.96419300  | 0.23586900  | -3.76908800 |
| C  | -1.62206500 | 2.35376700  | -3.33169100 |
| H  | -1.88002400 | 2.44677500  | -4.38880600 |
| H  | -2.51250000 | 2.35626600  | -2.70022500 |
| H  | -0.95731600 | 3.16418200  | -3.03004000 |
| C  | -0.52605900 | 0.91470600  | -1.68254800 |
| H  | -1.44617200 | 0.99177300  | -1.10514200 |
| H  | -0.07140100 | -0.06576500 | -1.55725200 |
| H  | 0.17240600  | 1.70633700  | -1.40468000 |
| C  | -1.64443400 | -0.11416500 | -3.62510400 |
| C  | -2.89269100 | -0.47708500 | -2.83677800 |
| H  | -0.94833100 | -0.95910600 | -3.60352700 |
| H  | -1.90595500 | 0.10238200  | -4.66510400 |
| H  | -3.46904300 | 0.41514600  | -2.55803900 |
| H  | -3.50855700 | -1.09306100 | -3.50543400 |
| O  | -2.53565900 | -1.21877000 | -1.68132300 |
| H  | -3.35885900 | -1.39813200 | -1.17738300 |
| Cl | -3.86910800 | 2.27237900  | -0.66774200 |
| C  | -1.80739000 | 4.78588100  | 0.73290700  |
| C  | -0.68739400 | 3.75806300  | 0.53247800  |
| H  | -1.37790300 | 5.74386600  | 1.05094200  |
| H  | -2.50091200 | 4.43598900  | 1.50843000  |
| C  | 0.33736500  | 3.84546600  | 1.64538700  |
| H  | -1.12411300 | 2.74608900  | 0.50768700  |
| H  | 0.75319600  | 4.86084000  | 1.68568000  |
| H  | -0.13846400 | 3.61683500  | 2.60621400  |
| O  | -2.46735600 | 5.03139300  | -0.48836900 |
| H  | -3.05186800 | 4.26255400  | -0.65755200 |
| O  | -0.02580200 | 4.01165800  | -0.69735500 |
| H  | -0.65359800 | 4.54568500  | -1.21296900 |
| O  | 1.39460400  | 2.91062900  | 1.48971800  |
| H  | 1.73708400  | 2.91458600  | 0.57405100  |
| S  | 0.74198100  | 0.67546900  | 2.18409800  |
| O  | 0.25325500  | 0.25359000  | 0.88152900  |
| O  | -0.28579800 | 1.12440700  | 3.11710500  |
| N  | -4.12302600 | -0.09068700 | 2.23920800  |
| C  | -3.99125800 | 1.32796000  | 2.70232400  |
| H  | -4.85415800 | 1.57340200  | 3.32431800  |
| H  | -3.06434200 | 1.40470100  | 3.27496300  |



|    |             |             |             |
|----|-------------|-------------|-------------|
| H  | -3.94861200 | 1.96909300  | 1.81816000  |
| C  | -4.28050100 | -0.98673500 | 3.42315100  |
| H  | -5.23344100 | -0.75999000 | 3.90620600  |
| H  | -4.23639000 | -2.03006500 | 3.09942000  |
| H  | -3.45608900 | -0.78049000 | 4.10837200  |
| C  | -2.86305400 | -0.45248100 | 1.50812800  |
| H  | -2.91520600 | -1.50602100 | 1.24624400  |
| H  | -2.79978400 | 0.18586800  | 0.62536800  |
| H  | -2.02471300 | -0.25729900 | 2.17723400  |
| C  | -5.32266400 | -0.16342500 | 1.31684200  |
| C  | -5.67653200 | -1.53231800 | 0.75579700  |
| H  | -5.11581200 | 0.54325700  | 0.50745100  |
| H  | -6.16990400 | 0.20834500  | 1.90373300  |
| H  | -5.82367300 | -2.27304800 | 1.55033000  |
| H  | -6.63974000 | -1.39247200 | 0.24980000  |
| O  | -4.73947200 | -2.02543300 | -0.17966400 |
| H  | -4.34918300 | -2.84195600 | 0.22869000  |
| Cl | -3.67822400 | -4.07414000 | 1.68805300  |
| C  | -0.51355500 | -3.90065100 | -0.35509700 |
| C  | -0.40008400 | -3.24279300 | 1.01717700  |
| H  | -1.53020600 | -4.28752500 | -0.49541300 |
| H  | 0.18745400  | -4.74064300 | -0.41160700 |
| C  | 0.98742600  | -2.68411300 | 1.23250600  |
| H  | -1.09508800 | -2.39164600 | 1.07066500  |
| H  | 1.72963000  | -3.49072600 | 1.12017700  |
| H  | 1.18215900  | -1.90154000 | 0.49312400  |
| O  | -0.15122400 | -2.97710300 | -1.37628000 |
| H  | -0.89467000 | -2.35972600 | -1.48812000 |
| O  | -0.63005300 | -4.14300300 | 2.07393700  |
| H  | -1.59507300 | -4.31132300 | 2.11105400  |
| O  | 1.09178700  | -2.10299300 | 2.53097400  |
| H  | 0.57950000  | -2.68921900 | 3.11209600  |
| N  | 5.00708100  | -0.81784300 | 1.52335200  |
| C  | 5.52143200  | -2.09573200 | 2.10050400  |
| H  | 4.90395200  | -2.36787600 | 2.95738700  |
| H  | 5.45341600  | -2.87175100 | 1.33706600  |
| H  | 6.55884900  | -1.95368000 | 2.40803400  |
| C  | 3.59546000  | -1.04315700 | 1.06945200  |
| H  | 2.99702000  | -1.29576400 | 1.94709200  |
| H  | 3.22938000  | -0.13602000 | 0.58312400  |
| H  | 3.57558100  | -1.86576800 | 0.34874100  |
| C  | 5.85411100  | -0.44342100 | 0.34454700  |
| H  | 5.38403300  | 0.38985800  | -0.17651400 |
| H  | 6.84326700  | -0.15180800 | 0.69938400  |

|    |            |             |             |
|----|------------|-------------|-------------|
| H  | 5.91241800 | -1.31900000 | -0.30490400 |
| C  | 5.05220200 | 0.23124900  | 2.61646600  |
| C  | 4.52003900 | 1.61003400  | 2.25640000  |
| H  | 6.09986500 | 0.31070800  | 2.92201100  |
| H  | 4.46472900 | -0.18625100 | 3.44013000  |
| H  | 3.50673700 | 1.54985200  | 1.84600100  |
| H  | 4.45253800 | 2.16001200  | 3.20424200  |
| O  | 5.38895000 | 2.27983400  | 1.38180300  |
| H  | 4.88508900 | 2.50356100  | 0.57918500  |
| Cl | 3.24540300 | 1.93413000  | -0.90781200 |
| C  | 3.53665200 | -0.60287500 | -3.92146100 |
| C  | 3.27566500 | -1.20421400 | -2.54138600 |
| H  | 2.80958900 | -1.01926900 | -4.63166800 |
| H  | 4.53828800 | -0.90838300 | -4.26289300 |
| C  | 3.17910200 | -2.72483300 | -2.59701000 |
| H  | 4.10246700 | -0.90936200 | -1.87428000 |
| H  | 2.44979400 | -3.01465200 | -3.36754600 |
| H  | 4.14771800 | -3.16405300 | -2.85636100 |
| O  | 3.38911900 | 0.79884700  | -3.96575400 |
| H  | 3.64701500 | 1.20932000  | -3.12136800 |
| O  | 2.05428100 | -0.74972100 | -1.99465800 |
| H  | 2.21962500 | 0.11970500  | -1.57753000 |
| O  | 2.81513200 | -3.24096300 | -1.33954300 |
| H  | 1.92040500 | -2.90278700 | -1.15609300 |
